# Supplementary material for: Potential Efficacy of β-Amyrin Targeting Mycobacterial Universal Stress Protein by In Vitro and In Silico Approach
Source: MDPI journal article supplement (doi:10.3390/molecules27144581), 2022-07-18
Supplement: s1 [file s1]

## Supporting information

### Potential efficacy of $\beta$ -amylin targeting mycobacterial universal stress protein by *in vitro* and *in silico* approach

Md Amjad Beg <sup>1</sup>, Shivangi <sup>2</sup>, Obaid Afzal <sup>3\*</sup>, Md Sayeed Akhtar <sup>4</sup>, Abdulmalik S. A. Altamimi <sup>3</sup>, Afzal Hussain <sup>5</sup>, Ali Imam <sup>1</sup>, Mohammad Naiyaz Ahmad <sup>6,7</sup>, Sidharth Chopra <sup>6,7</sup>, Fareeda Athar <sup>1,\*</sup>

1. Centre for Interdisciplinary Research in Basic Science, Jamia Millia Islamia, Jamia Nagar, New Delhi 110025, India; md164429@st.jmi.ac.in (M.A.B.); fathar@jmi.ac.in (F.A.); ali.imamuit@gmail.com (A.I.).
2. CSIR-Institute of Genomics and Integrative Biology, Mall Road, Delhi 110007, India; mathuria93shivangi@gmail.com (S.).
3. Department of Pharmaceutical Chemistry, College of Pharmacy, Prince Sattam Bin Abdulaziz University, Al-Kharj 11942, Saudi Arabia; o.akram@psau.edu.sa (O.A.); as.altamimi@psau.edu.sa (A.S.A.A.).
4. Department of Clinical Pharmacy, College of Pharmacy, King Khalid University, Abha 61421, Saudi Arabia; mdhusain@kku.edu.sa (M.S.A.).
5. Department of Pharmaceutics, College of Pharmacy, King Saud University, P.O. Box 2457, Riyadh 11451, Saudi Arabia; afzal.pharma@gmail.com (A.H.).
6. Division of Molecular Microbiology and Immunology, CSIR-Central Drug Research Institute, Sector 10, Janakipuram Extension, Sitapur Road, Lucknow 226031, Uttar Pradesh, India; naiyaz.ahmad@gmail.com (M.N.A.); skchopra007@gmail.com (S.C.).
7. Academy of Scientific and Innovative Research (AcSIR), Ghaziabad 201002, Uttar Pradesh, India; naiyaz.ahmad@gmail.com (M.N.A.); skchopra007@gmail.com (S.C.).

\* **Correspondence:** fathar@jmi.ac.in (F.A.); o.akram@psau.edu.sa (O.A.); Tel.: +911126984492 (F.A.); +966115886094 (O.A.)

## Table of contents

| S. No. | Content                                                                                                                                                                  | Page No. |
|--------|--------------------------------------------------------------------------------------------------------------------------------------------------------------------------|----------|
| 1.     | <b>Table S1:</b> Minimum inhibitory concentration (MIC) of different plants extracts in various solvent fractions against <i>M. tuberculosis</i> strains.                | S3       |
| 2.     | <b>Figure S1:</b> Venn-diagram to categorized V.D.A category and known <i>Mtb</i> PDB structure protein.                                                                 | S4       |
| 3.     | <b>Figure S2:</b> Crystal structure of selected <i>M. tuberculosis</i> H <sub>37</sub> Rv proteins (PDB: 7LD8, 4Q4N, 5XE2, 4LJ1, 1TQ8, 4CHG, 5WZ4, 2JAX, 5SV2, 6L2A).    | S4       |
| 4.     | <b>Figure S3:</b> In multitarget proteins docking, the top hit selected phytoconstituents.                                                                               | S5       |
| 5.     | <b>Table S2:</b> List of the bioinformatics tools and databases for learning substantial outcome of Hypothetical protein from <i>M. tuberculosis</i> H <sub>37</sub> Rv. | S5       |
| 6.     | <b>Table S3:</b> Phytochemical constituents identified in the ethyl acetate aerial part extract of <i>A. aspera</i> using gas chromatography-mass spectrometry.          | S6-S7    |
| 7.     | <b>Table S4:</b> Phytochemical constituents identified in the ethyl acetate flower ash extract of <i>C. gigantea</i> using gas chromatography-mass spectrometry.         | S8-S9    |
| 8.     | <b>Table S5:</b> Physiochemical parameters of selected Virulence, detoxification, adaptation category proteins.                                                          | S10      |
| 9.     | <b>Table S6:</b> Secondary structure analysis of selected virulent proteins of <i>Mtb</i> .                                                                              | S10      |
| 10.    | <b>Table S7:</b> Selected hits and their binding free energy (kcal/mol) toward multiple target proteins.                                                                 | S11      |
| 11.    | <b>Table S8:</b> Selected compounds and their biological properties.                                                                                                     | S12-S13  |

**Table S1.** Minimum inhibitory concentration (MIC) of different plants extracts in various solvent fractions against *M. tuberculosis* strains.

| Extract code | MIC (mg/L)                                        |                                   |                             |      |                                  |
|--------------|---------------------------------------------------|-----------------------------------|-----------------------------|------|----------------------------------|
|              | <i>M. tuberculosis</i><br><i>H37Rv</i> ATCC 27294 | <i>M. abscessus</i><br>ATCC 19977 | <i>M. fortuitum</i><br>6841 | ATCC | <i>M. chelonae</i><br>ATCC 35752 |
| 1            | >64                                               | >64                               | >64                         |      | >64                              |
| 2            | >64                                               | >64                               | >64                         |      | >64                              |
| 3            | <b>64</b>                                         | >64                               | >64                         |      | >64                              |
| 4            | >64                                               | >64                               | >64                         |      | >64                              |
| 5            | >64                                               | >64                               | >64                         |      | >64                              |
| 6            | >64                                               | >64                               | >64                         |      | >64                              |
| 7            | >64                                               | >64                               | >64                         |      | >64                              |
| 8            | >64                                               | >64                               | >64                         |      | >64                              |
| 9            | >64                                               | >64                               | >64                         |      | >64                              |
| 10           | >64                                               | >64                               | >64                         |      | >64                              |
| 11           | >64                                               | >64                               | >64                         |      | >64                              |
| 12           | >64                                               | >64                               | >64                         |      | >64                              |
| 13           | >64                                               | >64                               | >64                         |      | >64                              |
| 14           | >64                                               | >64                               | >64                         |      | >64                              |
| 15           | >64                                               | >64                               | >64                         |      | >64                              |
| 16           | >64                                               | >64                               | >64                         |      | >64                              |
| 17           | >64                                               | >64                               | >64                         |      | >64                              |
| 18           | >64                                               | >64                               | >64                         |      | >64                              |
| 19           | >64                                               | >64                               | >64                         |      | >64                              |
| 20           | >64                                               | >64                               | >64                         |      | >64                              |
| 21           | >64                                               | >64                               | >64                         |      | >64                              |
| 22           | >64                                               | >64                               | >64                         |      | >64                              |
| 23           | <b>64</b>                                         | >64                               | >64                         |      | >64                              |
| Isoniazid    | 0.03                                              | NT                                | NT                          |      | NT                               |
| Rifampicin   | 0.03                                              | NT                                | NT                          |      | NT                               |
| Streptomycin | 1                                                 | NT                                | NT                          |      | NT                               |
| Ethambutol   | 1                                                 | NT                                | NT                          |      | NT                               |
| Levofloxacin | NT                                                | 2                                 | 0.06                        |      | 0.06                             |

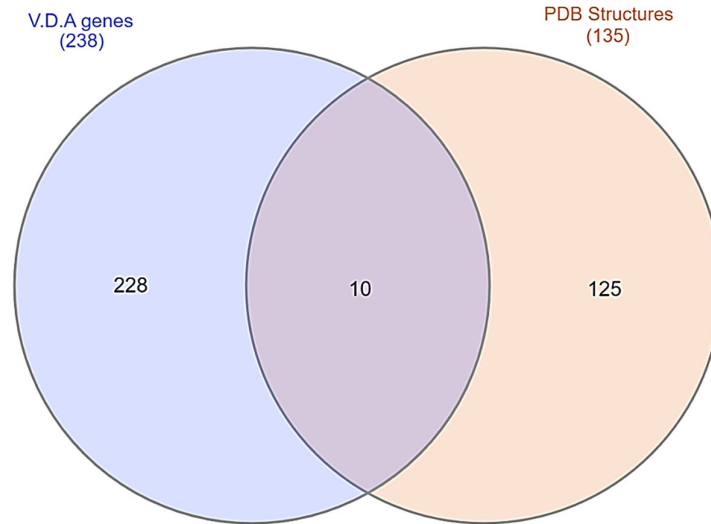

**Figure S1.** Venn-diagram to categorized V.D.A category and known *Mtb* PDB structure protein.

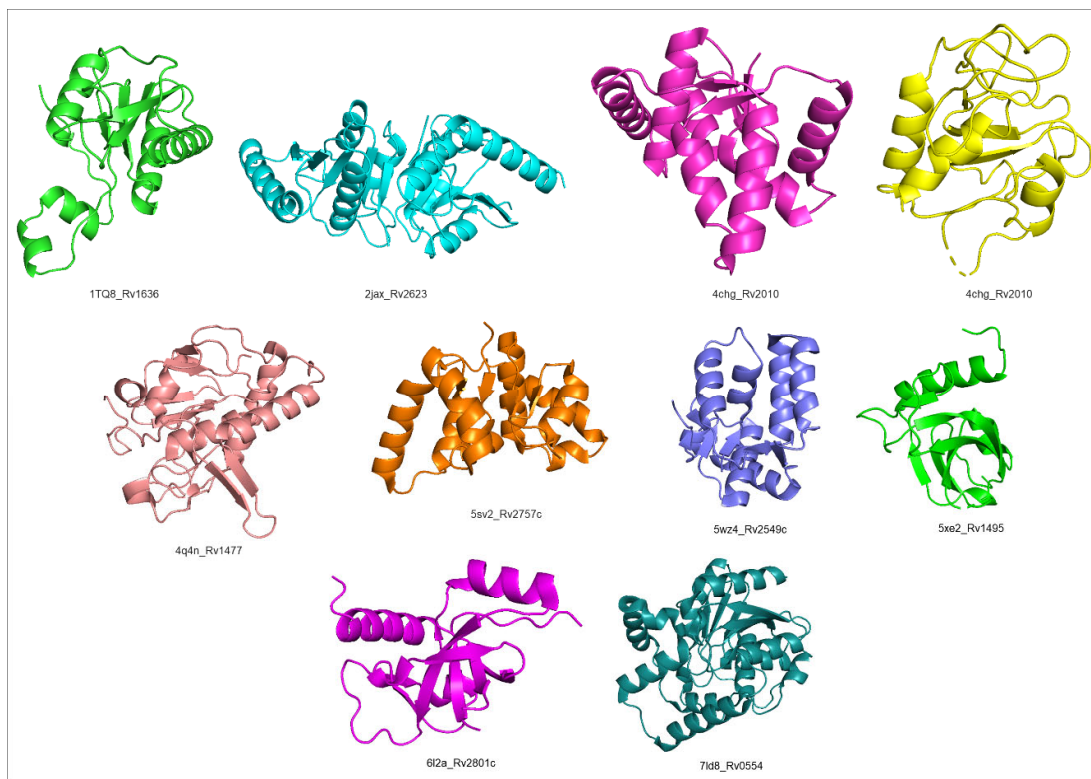

**Figure S2.** Crystal structure of selected *M. tuberculosis* H<sub>37</sub>Rv proteins (PDB: 7LD8, 4Q4N, 5XE2, 4LJ1, 1TQ8, 4CHG, 5WZ4, 2JAX, 5SV2, 6L2A).

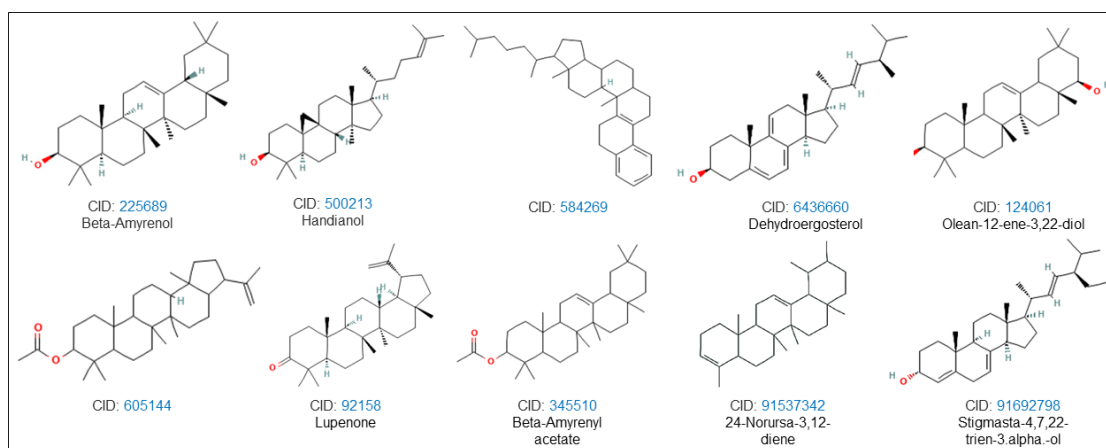

**Figure S3.** In multitarget proteins docking, the top hit selected phytoconstituents.

**Table S2.** List of the bioinformatics tools and databases for learning substantial outcome of Hypothetical protein from *M. tuberculosis H37Rv*.

| S.No. | Server/<br>Database | Application                    | URL                                                                                                                             |
|-------|---------------------|--------------------------------|---------------------------------------------------------------------------------------------------------------------------------|
| 1     | NCBI                | Database                       | <a href="https://www.ncbi.nlm.nih.gov/genome/?term=h37RV">https://www.ncbi.nlm.nih.gov/genome/?term=h37RV</a>                   |
| 2     | Mycobrowser         | Sequence retrieval             | <a href="https://mycobrowser.epfl.ch/genes/">https://mycobrowser.epfl.ch/genes/</a>                                             |
| 3     | VICMpred            | Virulence factor               | <a href="http://bioinfo.icgeb.res.in/virulent">http://bioinfo.icgeb.res.in/virulent</a>                                         |
| 4     | ProtParam           | Physiochemical parameters      | <a href="http://www.web.expasy.org/protparam">www.web.expasy.org/protparam</a>                                                  |
| 5     | TBpred              | Localization of TB protein.    | <a href="http://crdd.osdd.net/raghava/tbpred/">http://crdd.osdd.net/raghava/tbpred/</a>                                         |
| 6     | STRING              | Protein-protein interaction    | <a href="https://string-db.org/cgi/network.pl?taskId=BUe3enVFzh8M">https://string-db.org/cgi/network.pl?taskId=BUe3enVFzh8M</a> |
| 7     | STITCH              | Protein- chemical interaction. | <a href="http://stitch1.embl.de/">http://stitch1.embl.de/</a>                                                                   |
| 8     | PSIPRED             | Secondary Structure            | <a href="http://bioinf.cs.ucl.ac.uk">http://bioinf.cs.ucl.ac.uk</a>                                                             |
| 9     | RAMPAGE             | Structure validation           | <a href="https://services.mbi.ucla.edu/SAVES/">https://services.mbi.ucla.edu/SAVES/</a>                                         |
| 10    | ChemDraw Ultra 12.0 | Draw 3D compound's structure   | -                                                                                                                               |
| 11    | InstaDock Vina      | Molecular docking              | -                                                                                                                               |
| 12    | PyMOL               | Visualizer                     | -                                                                                                                               |
| 13    | Discovery Studio    | 2D interaction                 | -                                                                                                                               |

**Table S3.** Phytochemical constituents identified in the ethyl acetate aerial part extract of *A. aspera* using gas chromatography-mass spectrometry.

| Peak# | R. Time | Area     | Area% | Name                                                        |
|-------|---------|----------|-------|-------------------------------------------------------------|
| 1     | 7.495   | 773531   | 0.23  | 1-Pentadecene                                               |
| 2     | 7.593   | 418354   | 0.12  | TETRADECANE                                                 |
| 3     | 7.762   | 585922   | 0.17  | 5-DECYNE-4,7-DIOL, 2,4,7,9-TETRAMETHYL-                     |
| 4     | 8.280   | 675148   | 0.20  | 5,9-Undecadien-2-one, 6,10-dimethyl-                        |
| 5     | 8.877   | 270775   | 0.08  | PENTADECANE                                                 |
| 6     | 9.089   | 1844602  | 0.54  | PHENOL, 2,4-BIS(1,1-DIMETHYLETHYL)-                         |
| 7     | 9.504   | 824221   | 0.24  | 2(4H)-Benzofuranone, 5,6,7,7a-tetrahydro-4,4,7a-trimethyl   |
| 8     | 9.838   | 1864425  | 0.55  | N,N-BIS(2-HYDROXYETHYL)DODECANAMIDE                         |
| 9     | 10.016  | 1749833  | 0.51  | 1-HEXADECENE                                                |
| 10    | 10.097  | 829629   | 0.24  | Tetradecane                                                 |
| 11    | 11.205  | 1007133  | 0.30  | 2-Propenoic acid, tridecyl ester                            |
| 12    | 12.067  | 2950394  | 0.87  | Tetradecanoic acid                                          |
| 13    | 12.285  | 1915922  | 0.56  | 1-Nonadecene                                                |
| 14    | 12.748  | 1116488  | 0.33  | Neophytadiene                                               |
| 15    | 12.817  | 3702276  | 1.09  | 2-Pentadecanone, 6,10,14-trimethyl-                         |
| 16    | 12.963  | 635774   | 0.19  | 14-Pentadecenoic acid                                       |
| 17    | 13.059  | 879473   | 0.26  | 1,2-Benzenedicarboxylic acid, bis(2-methylpropyl) ester     |
| 18    | 13.295  | 723814   | 0.21  | 17-PENTATRIACONTENE                                         |
| 19    | 13.558  | 2297475  | 0.68  | 5,9,13-Pentadecatrien-2-one, 6,10,14-trimethyl-, (E,E)-     |
| 20    | 13.667  | 6447825  | 1.90  | HEXADECANOIC ACID, METHYL ESTER                             |
| 21    | 13.752  | 613115   | 0.18  | Benzenepropanoic acid, 3,5-bis(1,1-dimethylethyl)-4-hydr    |
| 22    | 13.883  | 237926   | 0.07  | 1-HEXADECEN-3-OL, 3,5,11,15-TETRAMETHYL-                    |
| 23    | 13.950  | 910874   | 0.27  | 9-HEXADECENOIC ACID                                         |
| 24    | 14.203  | 50955888 | 14.98 | n-Hexadecanoic acid                                         |
| 25    | 14.337  | 2338050  | 0.69  | 9-OCTADECENOIC ACID (Z)-                                    |
| 26    | 15.100  | 1203664  | 0.35  | HEPTADECANOIC ACID                                          |
| 27    | 15.307  | 6156436  | 1.81  | 9,12-Octadecadienoic acid (Z,Z)-, methyl ester              |
| 28    | 15.366  | 5668991  | 1.67  | 9-Octadecenoic acid (Z)-, methyl ester                      |
| 29    | 15.491  | 16397172 | 4.82  | Phytol                                                      |
| 30    | 15.601  | 789766   | 0.23  | Methyl stearate                                             |
| 31    | 15.823  | 18021416 | 5.30  | 9,12-OCTADECADIENOIC ACID (Z,Z)-                            |
| 32    | 15.872  | 19828608 | 5.83  | cis-9-Hexadecenal                                           |
| 33    | 16.050  | 2244457  | 0.66  | Octadecanoic acid                                           |
| 34    | 16.208  | 1188140  | 0.35  | 9-TRICOSENE, (Z)-                                           |
| 35    | 16.378  | 2138708  | 0.63  | Phytol, acetate                                             |
| 36    | 17.127  | 565804   | 0.17  | 2-Methyltetracosane                                         |
| 37    | 17.372  | 1109140  | 0.33  | Methyl 18-methylnonadecanoate                               |
| 38    | 17.550  | 372972   | 0.11  | Cyclohexanecarboxamide, N-(4-fluorophenyl)-                 |
| 39    | 17.610  | 2172539  | 0.64  | 4,8,12,16-Tetramethylheptadecan-4-olide                     |
| 40    | 17.786  | 2264224  | 0.67  | FARNESYL ACETONE A                                          |
| 41    | 18.249  | 713268   | 0.21  | Eicosanal-                                                  |
| 42    | 18.793  | 3251974  | 0.96  | n-Tetracosanol-1                                            |
| 43    | 19.503  | 430100   | 0.13  | Docosanoic acid, ethyl ester                                |
| 44    | 19.621  | 853915   | 0.25  | Octacosyl acetate                                           |
| 45    | 19.698  | 1020727  | 0.30  | Eicosanoic acid, 2-(acetyloxy)-1-[(acetyloxy)methyl]ethyl e |
| 46    | 20.283  | 267266   | 0.08  | Octadecane, 1-iodo-                                         |
| 47    | 20.350  | 1128598  | 0.33  | 1-Heptacosanol                                              |

|    |        |          |      |                                                               |
|----|--------|----------|------|---------------------------------------------------------------|
| 48 | 20.521 | 490544   | 0.14 | Tetracosanoic acid, methyl ester                              |
| 49 | 20.652 | 419992   | 0.12 | (E)-Hexadec-2-enal                                            |
| 50 | 20.979 | 2537308  | 0.75 | 13-Docosenamide, (Z)-                                         |
| 51 | 21.121 | 14310068 | 4.21 | Squalene                                                      |
| 52 | 21.309 | 769003   | 0.23 | 1,6,10,14,18,22-Tetracosahexaen-3-ol,<br>2,6,10,15,19,23-hex  |
| 53 | 21.383 | 2040655  | 0.60 | .alpha.-Tocospiro A                                           |
| 54 | 21.548 | 2571707  | 0.76 | .alpha.-Tocospiro B                                           |
| 55 | 21.863 | 263618   | 0.08 | Disulfide, didodecyl                                          |
| 56 | 21.952 | 1962881  | 0.58 | Oxirane, 2,2-dimethyl-3-(3,7,12,16,20-pentamethyl-<br>3,7,11, |
| 57 | 22.496 | 963942   | 0.28 | Ergosta-5,7,9(11),22-tetraen-3-ol, (3.beta.,22E)-             |
| 58 | 22.682 | 698890   | 0.21 | ERGOSTA-5,22-DIEN-3-OL, (3.BETA.,22E,24S)-                    |
| 59 | 22.870 | 346416   | 0.10 | Hexadecanamide                                                |
| 60 | 22.935 | 1460955  | 0.43 | Stigmasta-4,7,22-trien-3.alpha.-ol                            |
| 61 | 23.083 | 275604   | 0.08 | .beta.-Tocopherol                                             |
| 62 | 23.140 | 381403   | 0.11 | Stigmasta-5,22-dien-3-ol, acetate, (3.beta.)-                 |
| 63 | 23.261 | 1712582  | 0.50 | .gamma.-Tocopherol                                            |
| 64 | 23.551 | 2979708  | 0.88 | Stigmasta-5,22-dien-3-ol, acetate, (3.beta.)-                 |
| 65 | 23.777 | 1839492  | 0.54 | STIGMAST-5-EN-3-OL, OLEAT                                     |
| 66 | 24.098 | 5933162  | 1.74 | Vitamin E                                                     |
| 67 | 24.683 | 1107733  | 0.33 | 2H-1-BENZOPYRAN, 3,4,4A,5,6,8A-HEXAHY-<br>DRO-2,5,            |
| 68 | 24.925 | 1546130  | 0.45 | Lathosterol                                                   |
| 69 | 25.202 | 2926186  | 0.86 | SOLANESOL                                                     |
| 70 | 25.553 | 5053865  | 1.49 | Ergost-5-en-3-ol, (3.beta.)-                                  |
| 71 | 25.917 | 24590581 | 7.23 | Stigmasterol                                                  |
| 72 | 26.118 | 7853233  | 2.31 | 24-NOR-CHOLEST-22-ENE                                         |
| 73 | 26.465 | 2377824  | 0.70 | Ergost-7-en-3-ol                                              |
| 74 | 26.642 | 1570747  | 0.46 | 22-Stigmasten-3-one                                           |
| 75 | 26.863 | 29419710 | 8.65 | .gamma.-Sitosterol                                            |
| 76 | 27.252 | 1661821  | 0.49 | 7,22-Ergostadienone                                           |
| 77 | 27.616 | 7664879  | 2.25 | .beta.-Amyrin                                                 |
| 78 | 27.904 | 11019318 | 3.24 | Stigmast-7-en-3-ol, (3.beta.,5.alpha.,24S)-                   |
| 79 | 28.254 | 3305541  | 0.97 | 9,19-Cyclolanost-24-en-3-ol, (3.beta.)-                       |
| 80 | 28.882 | 2486691  | 0.73 | 5-(1,5-DIMETHYLHEXYL)-5A,7B-DIMETHYL-<br>2,2A,2B              |
| 81 | 29.171 | 2609211  | 0.77 | STIGMAST-4-EN-3-ONE                                           |
| 82 | 29.373 | 8470333  | 2.49 | 9,19-Cyclolanostan-3-ol, 24-methylene-, (3.beta.)-            |
| 83 | 30.069 | 1639645  | 0.48 | Lup-20(29)-en-3-ol, acetate, (3.beta.)-                       |
| 84 | 31.410 | 2840849  | 0.84 | Phytyl palmitate                                              |
| 85 | 32.388 | 1838788  | 0.54 | LUP-20(29)-EN-3-YL ACETATE                                    |
| 86 | 33.904 | 1222814  | 0.36 | SOLANESOL                                                     |
| 87 | 37.110 | 2674619  | 0.79 | Isopropyl linoleate                                           |

**Table S4.** Phytochemical constituents identified in the ethyl acetate flower ash extract of *C. gigantea* using gas chromatography-mass spectrometry.

| Peak# | R. Time | Area     | Area% | Name                                                       |
|-------|---------|----------|-------|------------------------------------------------------------|
| 1     | 10.015  | 1049325  | 0.07  | 1-Pentadecene                                              |
| 2     | 12.063  | 2541556  | 0.17  | Tetradecanoic acid                                         |
| 3     | 12.815  | 817504   | 0.06  | 2-Pentadecanone, 6,10,14-trimethyl-                        |
| 4     | 13.119  | 4226712  | 0.29  | Pentadecanoic acid                                         |
| 5     | 13.669  | 21459140 | 1.48  | HEXADECANOIC ACID, METHYL ESTER                            |
| 6     | 13.957  | 2950312  | 0.20  | 9-Octadecen-1-ol, (Z)-                                     |
| 7     | 14.248  | 55237880 | 3.80  | n-Hexadecanoic acid                                        |
| 8     | 14.333  | 3879939  | 0.27  | HEXADECANOIC ACID, ETHYL ESTER                             |
| 9     | 15.043  | 1025451  | 0.07  | 4-Oxazolecarboxylic acid, 4,5-dihydro-2-phenyl-, 1-methy   |
| 10    | 15.137  | 2259099  | 0.16  | KAUR-16-ENE                                                |
| 11    | 15.312  | 24787855 | 1.71  | 9,12-Octadecadienoic acid (Z,Z)-, methyl ester             |
| 12    | 15.373  | 27535750 | 1.90  | 9-Octadecenoic acid, methyl ester, (E)-                    |
| 13    | 15.502  | 1301829  | 0.09  | Phytol                                                     |
| 14    | 15.602  | 3624595  | 0.25  | Methyl stearate                                            |
| 15    | 15.917  | 55470106 | 3.82  | 9,12-Octadecadienoic acid (Z,Z)-                           |
| 16    | 16.096  | 2608913  | 0.18  | 9-OCTADECENOIC ACID (Z)-                                   |
| 17    | 16.259  | 2082406  | 0.14  | Octadecanamide                                             |
| 18    | 17.128  | 6313870  | 0.43  | Heneicosane                                                |
| 19    | 17.377  | 2753535  | 0.19  | Methyl 18-methylnonadecanoate                              |
| 20    | 17.566  | 3965414  | 0.27  | CYCLOHEXANE, DECYL-                                        |
| 21    | 17.786  | 2191892  | 0.15  | 9-Octadecenamide, (Z)-                                     |
| 22    | 17.962  | 3686080  | 0.25  | Tetratetracontane                                          |
| 23    | 18.575  | 1238454  | 0.09  | 17-Pentatriacontene                                        |
| 24    | 18.771  | 8418747  | 0.58  | Heneicosane                                                |
| 25    | 19.012  | 1300090  | 0.09  | DOCOSANOIC ACID, METHYL ESTER                              |
| 26    | 19.449  | 1402223  | 0.10  | Hexadecanoic acid, phenylmethyl ester                      |
| 27    | 19.697  | 3563535  | 0.25  | Eicosanoic acid, 2-(acetyloxy)-1-[(acetyloxy)methyl] ethyl |
| 28    | 19.774  | 3189240  | 0.22  | 2-OCTADECENOIC ACID, METHYL ESTER                          |
| 29    | 20.117  | 2665701  | 0.18  | Eicosyl trifluoroacetate                                   |
| 30    | 20.290  | 5652738  | 0.39  | Heneicosane                                                |
| 31    | 20.524  | 1203777  | 0.08  | Tetracosanoic acid, methyl ester                           |
| 32    | 20.781  | 2622561  | 0.18  | 9,12-Octadecadienoic acid (Z,Z)-, phenylmethyl ester       |
| 33    | 20.979  | 9660544  | 0.66  | 9-OCTADECENAMIDE                                           |
| 34    | 21.121  | 4385069  | 0.30  | Squalene                                                   |
| 35    | 21.384  | 1189944  | 0.08  | . alpha. -Tocospiro B                                      |
| 36    | 21.585  | 6493662  | 0.45  | 1-EICOSANOL                                                |
| 37    | 21.759  | 3097061  | 0.21  | Tetracontane                                               |
| 38    | 21.953  | 1398822  | 0.10  | Oxirane, 2,2-dimethyl-3-(3,7,12,16,20-pentamethyl-3,7,11,  |
| 39    | 22.037  | 2408085  | 0.17  | METHYL DIHYDROMALVALATE                                    |
| 40    | 22.935  | 3298080  | 0.23  | Stigmasta-4,7,22-trien-3.alpha.-ol                         |
| 41    | 23.259  | 1827051  | 0.13  | .gamma.-Tocopherol                                         |
| 42    | 23.397  | 3123229  | 0.21  | 1-EICOSANOL                                                |
| 43    | 23.483  | 762688   | 0.05  | 1-EICOSANOL                                                |
| 44    | 23.553  | 1738051  | 0.12  | Stigmasta-5,22-dien-3-ol, acetate, (3.beta.)-              |
| 45    | 23.632  | 1471295  | 0.10  | 9-(3,3-DIMETHYL-2-OXIRANYL)-2,7-DIMETHYL-2,6-              |
| 46    | 23.779  | 2467991  | 0.17  | STIGMAST-5-EN-3-OL, (3.BETA.)-                             |
| 47    | 24.104  | 2032042  | 0.14  | Vitamin E                                                  |



|    |        |            |        |                                                                |
|----|--------|------------|--------|----------------------------------------------------------------|
| 48 | 24.729 | 1338461    | 0.09   | .ALPHA.-SELINENE                                               |
| 49 | 25.574 | 36839194   | 2.54   | ERGOST-5-EN-3-OL, (3.BETA.,24R)-                               |
| 50 | 25.951 | 57165303   | 3.93   | Stigmasterol                                                   |
| 51 | 26.923 | 56259699   | 3.87   | .gamma.-Sitosterol                                             |
| 52 | 27.180 | 2789530    | 0.19   | Fucosterol                                                     |
| 53 | 27.664 | 57904082   | 3.99   | .beta.-Amyrin                                                  |
| 54 | 27.883 | 6193541    | 0.43   | 24-Norursa-3,12-diene                                          |
| 55 | 28.054 | 8952706    | 0.62   | 4,22-Stigmastadiene-3-one                                      |
| 56 | 28.332 | 3373817    | 0.23   | 9,19-Cyclolanost-24-en-3-ol, (3.beta.)-                        |
| 57 | 28.538 | 83296093   | 5.73   | METHYL COMMATE D                                               |
| 58 | 28.990 | 1963487    | 0.14   | Stigmasta-3,5-diene                                            |
| 59 | 29.318 | 199402288  | 13.72  | 4,4,6a,6b,8a,11,11,14b-Octamethyl-<br>1,4,4a,5,6,6a,6b,7,8,8a, |
| 60 | 29.621 | 3253155    | 0.22   | METHYL COMMATE B                                               |
| 61 | 29.852 | 4570682    | 0.31   | Lup-20(29)-en-3-one                                            |
| 62 | 30.361 | 286766478  | 19.74  | Lup-20(29)-en-3-ol, acetate, (3.beta.)-                        |
| 63 | 30.697 | 79643969   | 5.48   | Lupeol                                                         |
| 64 | 31.478 | 16540535   | 1.14   | Cyclopropa[5,6]stigmast-22-en-3-ol, 3',6'-dihydro-, (3.beta.,  |
| 65 | 32.245 | 44151018   | 3.04   | A'-Neogammacer-22(29)-en-3-ol, acetate, (3.beta.,21.beta.)     |
| 66 | 32.630 | 100754447  | 6.93   | LUP-20(29)-EN-3-YL ACETATE                                     |
| 67 | 36.603 | 41854800   | 2.88   | Olean-12-en-3-ol, acetate, (3.beta.)-                          |
| 68 | 38.355 | 51580680   | 3.55   | METHYL COMMATE A                                               |
|    |        | 1452973808 | 100.00 |                                                                |

**Table S5.** Physiochemical parameters of selected Virulence, detoxification, adaptation category proteins.

| S. No. | Protein Seq. | No. of amino acids | MW (~kDa) | pI    | Ext. Cof. | Instability index | Aliphatic index | GRAVY  |
|--------|--------------|--------------------|-----------|-------|-----------|-------------------|-----------------|--------|
| 1      | Rv0554       | 262                | 28.349    | 5.26  | 27055     | 27.17 (Stable)    | 89.08           | 0.065  |
| 2      | Rv1477       | 472                | 49.808    | 9.08  | 46995     | 41.76 (Unstable)  | 79.34           | -0.251 |
| 3      | Rv1495       | 105                | 11.377    | 8.09  | 22460     | 22.40 (Stable)    | 91.05           | -0.190 |
| 4      | Rv1566c      | 230                | 23.964    | 10.23 | 15930     | 55.24 (Unstable)  | 80.13           | -0.111 |
| 5      | Rv1636       | 146                | 15.312    | 5.51  | 5960      | 25.53 (Stable)    | 106.30          | 0.005  |
| 6      | Rv2010       | 132                | 14.731    | 6.29  | 14105     | 55.56 (Unstable)  | 106.52          | 0.061  |
| 7      | Rv2549c      | 131                | 14.619    | 6.51  | 30480     | 17.96 (Stable)    | 79.01           | -0.137 |
| 8      | Rv2623       | 297                | 31.652    | 5.45  | 47105     | 52.60 (Unstable)  | 105.32          | 0.104  |
| 9      | Rv2757c      | 138                | 15.773    | 6.65  | 23950     | 32.09 (Stable)    | 91.23           | -0.307 |
| 10     | Rv2801c      | 118                | 12.858    | 9.10  | 12490     | 34.20 (Stable)    | 107.46          | -0.067 |

**Table S6.** Secondary structure analysis of selected virulent proteins of *Mtb*.

| S.no. | Protein | Alpha helix  | Extended strand | Beta turn   | Random coil  |
|-------|---------|--------------|-----------------|-------------|--------------|
| 1     | Rv0554  | 117 (44.66%) | 37 (14.12%)     | 14 (5.34%)  | 94 (35.88%)  |
| 2     | Rv1477  | 230 (48.73%) | 50 (10.59%)     | 28 (5.93%)  | 164 (34.75%) |
| 3     | Rv1495  | 35 (33.33%)  | 25 (23.81%)     | 2 (1.90%)   | 43 (40.95%)  |
| 4     | Rv1566c | 35 (15.22%)  | 37 (16.09%)     | 27 (11.74%) | 131 (56.96%) |
| 5     | Rv1636  | 68 (46.58%)  | 28 (19.18%)     | 8 (5.48%)   | 42 (28.77%)  |
| 6     | Rv2010  | 78 (59.09%)  | 14 (10.61%)     | 6 (4.55%)   | 34 (25.76%)  |
| 7     | Rv2549c | 72 (54.96%)  | 23 (17.56%)     | 8 (6.11%)   | 28 (21.37%)  |
| 8     | Rv2623  | 115 (38.72%) | 58 (19.53%)     | 14 (4.71%)  | 110 (37.04%) |
| 9     | Rv2757c | 87 (63.04%)  | 13 (9.42%)      | 9 (6.52%)   | 29 (21.01%)  |
| 10    | Rv2801c | 44 (37.29%)  | 23 (19.49%)     | 8 (6.78%)   | 43 (36.44%)  |

**Table S7.** Selected hits and their binding free energy (kcal/mol) toward multiple target proteins.

| S. No. | Receptor   | Name of the ligand | Binding Free Energy (kcal/mol) | pKi  | Ligand Efficiency (kcal/mol/non-H atom) | Torsional Energy |
|--------|------------|--------------------|--------------------------------|------|-----------------------------------------|------------------|
| 1      | Rv1636_A*  | 225689             | -10.6                          | 7.77 | 0.3118                                  | 0.3113           |
| 2      | Rv1636_G*  | 225689             | -10.6                          | 7.77 | 0.3118                                  | 0.3113           |
| 3      | Rv2623_A*  | 500213             | -8.8                           | 6.45 | 0.2316                                  | 1.5565           |
| 4      | Rv2623_G*  | 500213             | -9.2                           | 6.75 | 0.2421                                  | 1.5565           |
| 5      | Rv2010_A*  | 500213             | -7.5                           | 5.5  | 0.1974                                  | 1.5565           |
| 6      | Rv2010_G*  | 124061             | -8.1                           | 5.94 | 0.225                                   | 0.6226           |
| 7      | Rv1566_A*  | 225689             | -10.7                          | 7.85 | 0.3147                                  | 0.3113           |
| 8      | Rv1566_G*  | 225689             | -10.6                          | 7.77 | 0.3118                                  | 0.3113           |
| 9      | Rv1477_A*  | 225689             | -7.8                           | 5.72 | 0.2294                                  | 0.3113           |
| 10     | Rv1477_G*  | 605144             | -8.2                           | 6.01 | 0.2103                                  | 0.9339           |
| 11     | Rv2757c_A* | 584269             | -9                             | 6.6  | 0.2143                                  | 1.5565           |
| 12     | Rv2757c_G* | 605144             | -9.1                           | 6.67 | 0.2333                                  | 0.9339           |
| 13     | Rv2549c_A* | 225689             | -7.9                           | 5.79 | 0.2324                                  | 0.3113           |
| 14     | Rv2549c_G* | 92158              | -8                             | 5.87 | 0.2353                                  | 0.3113           |
| 15     | Rv1495_A*  | 225689             | -8.7                           | 6.38 | 0.2559                                  | 0.3113           |
| 16     | Rv1495_G*  | 345510             | -8.8                           | 6.45 | 0.2316                                  | 0.6226           |
| 17     | Rv2801c_A* | 6436660            | -7.9                           | 5.79 | 0.2194                                  | 1.5565           |
| 18     | Rv2801c_G* | 91735342           | -7.9                           | 5.79 | 0.2548                                  | 0                |
| 19     | Rv0554_A*  | 6436660            | -9.6                           | 7.04 | 0.2667                                  | 1.5565           |
| 20     | Rv0554_G*  | 91692798           | -9.7                           | 7.11 | 0.2553                                  | 1.8678           |

A\* Top hit selected from GCMS studies of *Achyranthes aspera* (medicinal plant).

G\* Top hit selected from GCMS studies of *Calotropis gigantea* (medicinal plant).

**Table S8.** Selected compounds and their biological properties.

| S.No. | PubChem ID | Pa    | Pi    | Biological activity                                 |
|-------|------------|-------|-------|-----------------------------------------------------|
| 1     | 225689     | 0,977 | 0,001 | Insulin promoter                                    |
|       |            | 0,976 | 0,002 | Caspase 3 stimulant                                 |
|       |            | 0,944 | 0,001 | Transcription factor stimulant                      |
|       |            | 0,944 | 0,001 | Transcription factor NF kappa B stimulant           |
|       |            | 0,939 | 0,004 | Mucomembranous protector                            |
|       |            | 0,926 | 0,002 | Hepatoprotectant                                    |
|       |            | 0,923 | 0,004 | Apoptosis agonist                                   |
|       |            | 0,916 | 0,005 | Antineoplastic                                      |
|       |            | 0,913 | 0,002 | Oxidoreductase inhibitor                            |
|       |            | 0,909 | 0,002 | Membrane integrity antagonist                       |
|       |            | 0,903 | 0,002 | Chemopreventive                                     |
| 2     | 500213     | 0,964 | 0,003 | Hypolipemic                                         |
|       |            | 0,952 | 0,002 | Chemopreventive                                     |
|       |            | 0,947 | 0,002 | Cholesterol antagonist                              |
|       |            | 0,933 | 0,000 | Sterol 24-C-methyltransferase inhibitor             |
| 3     | 584269     | 0,928 | 0,003 | Prostaglandin-E2 9-reductase inhibitor              |
|       |            | 0,919 | 0,004 | Alkenylglycerophosphocholine hydrolase inhibitor    |
| 4     | 6436660    | 0,959 | 0,002 | Antihypercholesterolemic                            |
|       |            | 0,947 | 0,003 | Caspase 3 stimulant                                 |
|       |            | 0,928 | 0,001 | Alcohol O-acetyltransferase inhibitor               |
|       |            | 0,917 | 0,003 | Cholesterol antagonist                              |
|       |            | 0,912 | 0,004 | Hypolipemic                                         |
|       |            | 0,910 | 0,002 | Oxidoreductase inhibitor                            |
| 5     | 124061     | 0,980 | 0,002 | Caspase 3 stimulant                                 |
|       |            | 0,965 | 0,002 | Insulin promoter                                    |
|       |            | 0,939 | 0,001 | Transcription factor stimulant                      |
|       |            | 0,939 | 0,001 | Transcription factor NF kappa B stimulant           |
|       |            | 0,934 | 0,002 | Hepatoprotectant                                    |
|       |            | 0,914 | 0,005 | Antineoplastic                                      |
|       |            | 0,909 | 0,004 | Apoptosis agonist                                   |
|       |            | 0,904 | 0,002 | Oxidoreductase inhibitor                            |
|       |            | 0,902 | 0,006 | Testosterone 17beta-dehydrogenase (NADP+) inhibitor |
| 6     | 605144     | 0,942 | 0,004 | Antineoplastic                                      |
|       |            | 0,929 | 0,003 | Antiprotozoal (Leishmania)                          |
|       |            | 0,923 | 0,003 | Caspase 3 stimulant                                 |
|       |            | 0,912 | 0,001 | Transcription factor NF kappa B stimulant           |
|       |            | 0,912 | 0,001 | Transcription factor stimulant                      |
|       |            | 0,906 | 0,002 | Hepatoprotectant                                    |
| 7     | 92158      | 0,955 | 0,004 | Antineoplastic                                      |
|       |            | 0,947 | 0,001 | Transcription factor NF kappa B stimulant           |
|       |            | 0,947 | 0,001 | Transcription factor stimulant                      |
|       |            | 0,921 | 0,003 | Antiprotozoal (Leishmania)                          |
|       |            | 0,903 | 0,004 | Apoptosis agonist                                   |
|       |            | 0,955 | 0,004 | Antineoplastic                                      |
| 8     | 345510     | 0,964 | 0,002 | Lipid metabolism regulator                          |
|       |            | 0,960 | 0,003 | Mucomembranous protector                            |
|       |            | 0,946 | 0,003 | Caspase 3 stimulant                                 |
|       |            | 0,941 | 0,002 | Insulin promoter                                    |
|       |            | 0,935 | 0,002 | Hepatoprotectant                                    |
|       |            | 0,925 | 0,001 | Oxidoreductase inhibitor                            |
|       |            | 0,922 | 0,005 | Antineoplastic                                      |
|       |            | 0,918 | 0,002 | Membrane integrity antagonist                       |

|    |          |       |       |                                           |
|----|----------|-------|-------|-------------------------------------------|
|    |          | 0,915 | 0,001 | Transcription factor stimulant            |
|    |          | 0,915 | 0,001 | Transcription factor NF kappa B stimulant |
|    |          | 0,915 | 0,002 | Chemopreventive                           |
|    |          | 0,911 | 0,004 | Apoptosis agonist                         |
| 9  | 91537342 | 0,911 | 0,004 | Apoptosis agonist                         |
|    |          | 0,907 | 0,005 | Antineoplastic                            |
|    |          | 0,900 | 0,004 | Antiinflammatory                          |
|    |          | 0,827 | 0,002 | Nitric oxide antagonist                   |
|    |          | 0,812 | 0,004 | Hepatic disorders treatment               |
|    |          | 0,803 | 0,003 | Transcription factor NF kappa B stimulant |
|    |          | 0,803 | 0,003 | Transcription factor stimulant            |
|    |          | 0,789 | 0,005 | Antiprotozoal (Leishmania)                |
|    |          | 0,771 | 0,005 | Antileukemic                              |
|    |          | 0,755 | 0,005 | Hepatoprotectant                          |
| 10 | 91692798 | 0,976 | 0,001 | Antihypercholesterolemic                  |
|    |          | 0,961 | 0,001 | Cholesterol antagonist                    |
|    |          | 0,920 | 0,004 | Hypolipemic                               |
|    |          | 0,900 | 0,001 | Alcohol O-acetyltransferase inhibitor     |
|    |          | 0,900 | 0,002 | Oxidoreductase inhibitor                  |
